# Supplementary material
Source: ML conference proceedings conference paper supplement (https://openaccess.thecvf.com/content/ICCV2025/html/Do_PAN-Crafter_Learning_Modality-Consistent_ICCV_2025_paper.html)
Supplement: Supplementary file 1 [file Do_PAN-Crafter_Learning_Modality-Consistent_ICCV_2025_supplemental.pdf]

# PAN-Crafter: Learning Modality-Consistent Alignment for PAN-Sharpening

## Supplementary Material

### A. Additional Discussions on Results

#### A.1. Additional Qualitative Comparisons

Fig. 8 and Fig. 9 provide additional qualitative comparisons of PS results on the WorldView-3 (WV3), QuickBird (QB), and GaoFen-2 (GF2) datasets [9] at full-resolution. Fig. 10 and Fig. 11 provide additional qualitative comparisons of PS results on the WV3, QB, GF2 datasets at reduced-resolution. Our PAN-Crafter consistently generates pan-sharpened images with minimal artifacts, preserving fine details around buildings and vehicles, whereas existing methods often produce blurring or structural distortions.

#### A.2. Additional Quantitative Evaluation

To provide a more comprehensive analysis, we present extended quantitative evaluations in the *Supplementary Material*. Table 6, Table 7, and Table 8 provide detailed results on the WV3, GF2, and QB datasets, respectively. The (i) metrics, (ii) full-/no-reference, and (iii) Wald’s evaluation protocol [42, 44] used for evaluations are quite commonly known for PS restoration in remote sensing. We confirm that all comparison methods were trained using their official codebases and were evaluated, following the same protocol [42, 44] used in the prior work [13, 30, 52, 62]. To ensure fairness, we applied the same data splits [9], random seeds, data augmentations. PAN-Crafter consistently achieves strong performance across various evaluation metrics, further demonstrating its effectiveness in preserving both spatial and spectral fidelity. These extended results reinforce the robustness of our approach across different datasets and imaging conditions.

#### A.3. Generalization on Unseen Satellite Dataset

To further evaluate the zero-shot generalization capability of PAN-Crafter, we provide additional quantitative and qualitative results on the unseen WorldView-2 (WV2) dataset [9]. Table 9 and Fig. 12 present quantitative and qualitative results, respectively. Despite not being trained on WV2, PAN-Crafter outperforms existing methods in both spatial and spectral fidelity, demonstrating its robustness to cross-sensor variations. The results highlight the effectiveness of our cross-modality alignment strategy, enabling strong generalization without requiring additional fine-tuning.

#### A.4. Computational Complexity

Efficiency is a critical factor in PS applications, particularly for real-time and large-scale remote sensing tasks. We eval-

uate the computational complexity of PAN-Crafter against state-of-the-art methods in terms of inference time, memory consumption, FLOPs, and the number of parameters, as summarized in Table 10. Our PAN-Crafter achieves a significant speedup over diffusion-based models, with over  $1110.78\times$  faster inference time compared to TMDiff [52] and over  $328.33\times$  faster than PanDiff [30], demonstrating the efficiency of our attention-based alignment mechanism. Compared to CANConv [13], which utilizes k-means clustering [10] for spatial adaptation, PAN-Crafter achieves  $50.11\times$  faster inference while maintaining competitive reconstruction quality.

### B. Limitations

#### B.1. Misalignment between multi-spectral bands

Our method addresses cross-modality misalignment but does not explicitly handle misalignment between multi-spectral bands. A potential solution is to apply depth-wise separable convolutional layers in CM3A for MS feature projection, preventing information mixing across spectral bands.

### C. Further Ablation Studies

#### C.1. Ablation studies on MARs and CM3A

Table 11, Table 12, and Table 13 present extended ablation studies on MARs and CM3A across WV3, GF2, and QB datasets. The results demonstrate the significant impact of MARs, which consistently improves both spatial and spectral fidelity by leveraging auxiliary PAN self-supervision. While CM3A alone provides only marginal benefits, its effectiveness is significantly amplified when combined with MARs. The bidirectional interaction between PAN and MS reconstruction in MARs enables CM3A to refine cross-modality alignment more effectively, leading to a synergistic enhancement in both spatial consistency and spectral preservation. These findings further validate the importance of jointly leveraging MARs and CM3A for robust PAN-sharpening.

**Ablation settings.** We clarify the ablation setups for the main components: (i) without MARs – we remove the PAN mode entirely, including all learnable parameters related to modality switching (i.e.,  $\alpha$ ,  $\beta$ , and  $\gamma$ ). This turns the architecture into a single-task (PS) network; (ii) without CM3A – we remove the concatenated original inputs ( $\mathbf{I}_{ms}^{lr,\downarrow}$ ,  $\mathbf{I}_{pan}^{rep,\downarrow}$ ) from the attention block, disabling cross-modality conditioning in the alignment mechanism.

## C.2. Additional ablation studies

Additional component-wise ablations on the WV3, GF2, and QB datasets were done: (i) without modulation parameters ( $\beta, \gamma$ ) – the modulation is not applied to the feature maps (Table 14); (ii) without combination parameter ( $\alpha$ ) – we eliminate the learnable fusion weight between features (Table 14); (iii) varying local attention window size  $k$  in CM3A (Table 15); (iv) two-stage learning with pretrain on the PAN back-reconstruction and finetune for PS (Table 16).

## C.3. Justification of ablation results

The reason that U-Net without MAR and CM3A is superior to existing methods is that our multi-scale window-based local attention [35] in U-Net is still effective to constitute a strong baseline. We additionally ablated this component and its result can be seen in the (Table 17). Without it (replacement of the local attention layer with convolution layer in the baseline model), the performance drop is significant.

## D. Discussion on Various Cross-Attention Approaches

While the two prior works employ cross-attention in multi-frame restoration [24] and reference-based SR [54], their setups are substantially different from ours. Siamtrans [24] applies cross-attention after warping adjacent video frames to a query frame, assuming strong temporal correlation and accurate alignment. Similarly, TTSR [54] uses global cross-attention between an LR image and a semantically unrelated HR reference. [24, 54] rely on global attention [12, 43], which is computationally expensive and less suitable for local misalignment patterns. In contrast, our CM3A module is specially tailored for PS, where PAN and MS images are often not significantly misaligned and share similar spatial structures. To effectively handle this, we introduce a novel MARs-mode-dependent local cross-/self-attention. Also, we replace fixed positional embeddings (PE) with down-sampled original images concatenated to the attention inputs to implicitly learn the relative misalignment between modalities. The distinction between [24, 54] and our CM3A is summarized as Table 5.

## E. Local Attention Mechanisms

Given a query feature  $\mathbf{Q} \in \mathbb{R}^{H \times W \times C}$  and key-value pairs  $\mathbf{K}, \mathbf{V} \in \mathbb{R}^{H \times W \times C}$ , Local Attention function (LocalAttn) [35] computes attention scores within the  $k \times k$  local receptive field as follows:

$$\begin{aligned} \text{Attn}_{i,j,m,n} &= \mathbf{Q}_{i,j} \mathbf{K}_{i+m,j+n}, \\ \text{Attn} &\leftarrow \text{SoftMax} \left( \text{Attn} / \sqrt{C} \right), \\ \text{LocalAttn}(\mathbf{Q}, \mathbf{K}, \mathbf{V})_{i,j} & \\ &= \sum_{m=-k'}^{k'} \sum_{n=-k'}^{k'} \text{Attn}_{i,j,m,n} \mathbf{V}_{i+m,j+n}, \end{aligned} \quad (13)$$

where  $\text{Attn} \in \mathbb{R}^{H \times W \times k \times k}$  is the attention score, and SoftMax is applied along the last two dimensions.

**Computational complexity analysis.** The computational complexity of a global self-attention layer for a feature map  $\mathbf{x}$  of size  $(H, W, C)$  is:

$$\mathcal{O}(2(HW)^2C), \quad (14)$$

due to pairwise interactions across all spatial locations. In contrast, CM3A leverages local attention with a fixed receptive field size of  $k \times k$ , reducing the complexity to:

$$\mathcal{O}(2(HW)k^2C). \quad (15)$$

Since  $k^2 \ll HW$ , our approach significantly reduces computational overhead while maintaining effective cross-modality feature alignment. By restricting attention to local neighborhoods, CM3A balances efficiency with the ability to capture localized structural discrepancies between PAN and MS images.



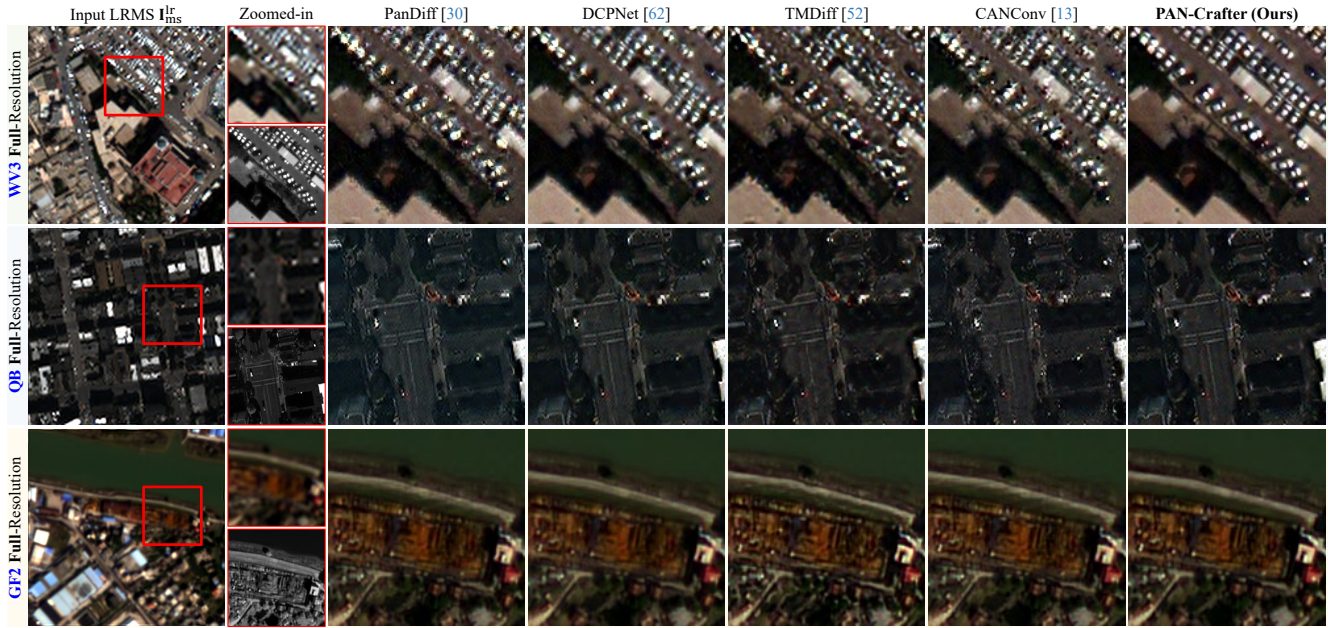

Figure 8. Visual comparison of PAN-Sharpening (PS) results on the WV3, QB, and GF2 datasets at full-resolution. The leftmost column shows the input LRMS images, with **red boxes** indicating zoomed-in regions for both LRMS and PAN images. Our PAN-Crafter method generates pan-sharpened images with minimal artifacts, particularly around buildings and vehicles, whereas other methods frequently produce blurry or distorted outputs.

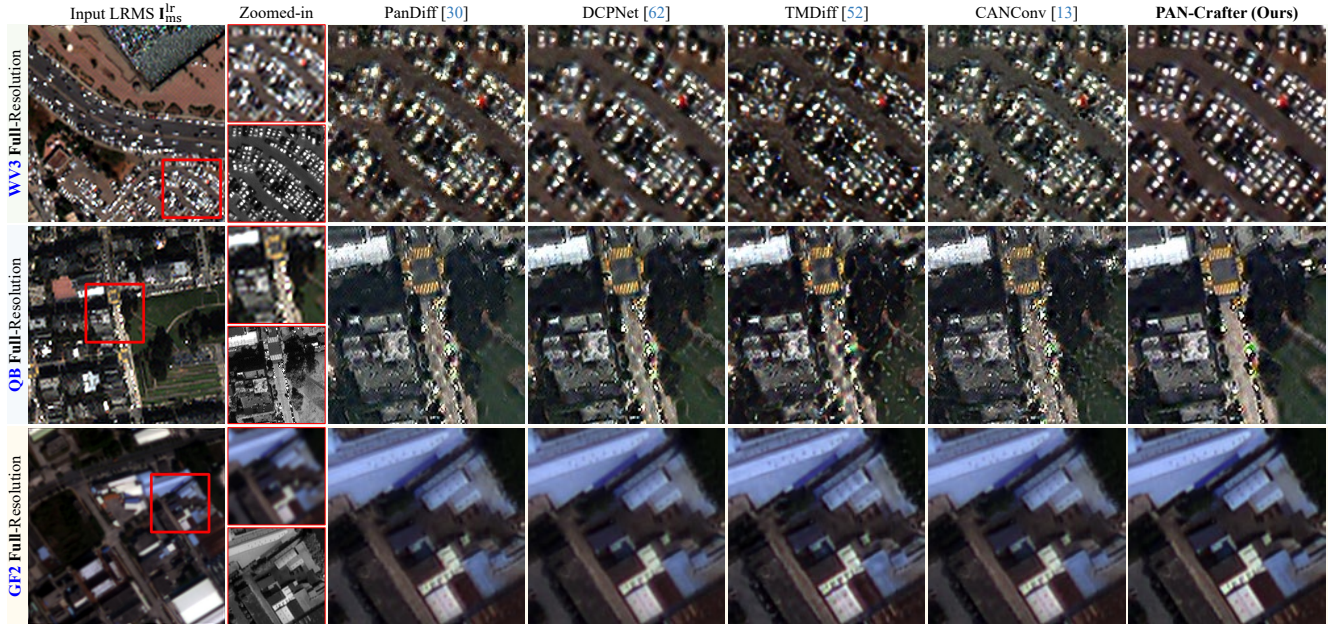

Figure 9. Visual comparison of PAN-Sharpening (PS) results on the WV3, QB, and GF2 datasets at full-resolution. The leftmost column shows the input LRMS images, with **red boxes** indicating zoomed-in regions for both LRMS and PAN images. Our PAN-Crafter method generates high-quality of pan-sharpened images with minimal artifacts, particularly around vehicles and crosswalks, whereas other methods frequently produce blurry or distorted outputs.



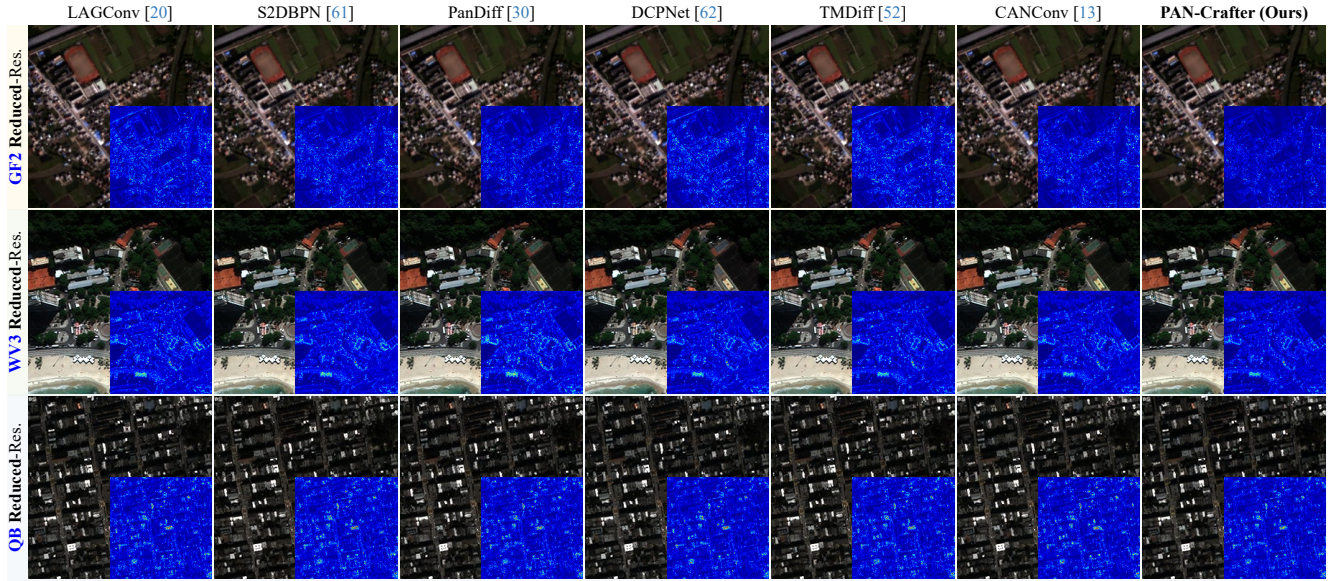

Figure 10. Visual comparison of PS results on the GF2 and QB datasets at reduced-resolution. The blue-colored insets represent error maps computed against the ground truth (GT), where brighter regions indicate higher reconstruction errors.

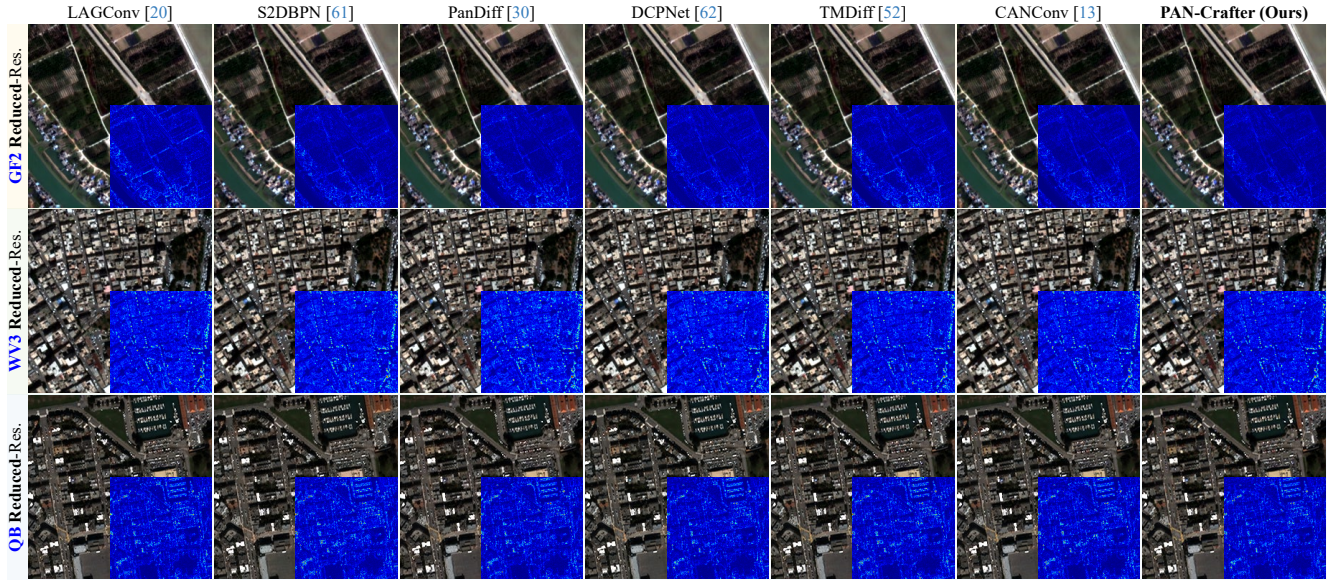

Figure 11. Visual comparison of PS results on the GF2 and QB datasets at reduced-resolution. The blue-colored insets represent error maps computed against the ground truth (GT), where brighter regions indicate higher reconstruction errors.

| Methods        | Tasks                   | Attn. types | Characteristics                           |
|----------------|-------------------------|-------------|-------------------------------------------|
| Siamtrans [24] | Multi-frame restoration | Global      | Only cross-attention with PE              |
| TTSR [54]      | Reference-based SR      | Global      | Only cross-attention with PE              |
| <b>Ours</b>    | PAN-sharpening          | Local       | MARs-mode-dependent cross-/self-attention |

Table 5. Comparison with ours CM3A with existing cross-attention methods.



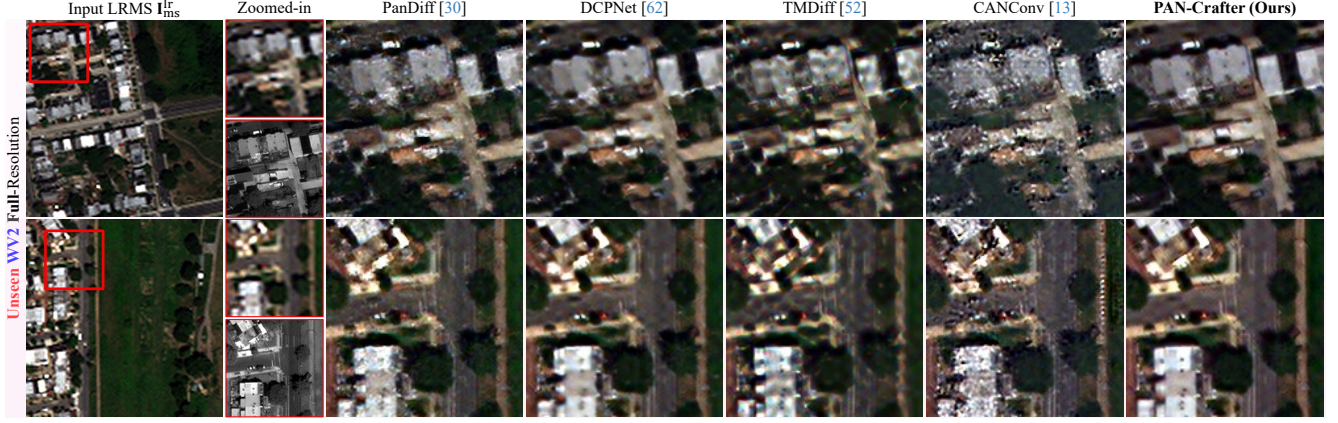

Figure 12. Visual comparison of PS results on the unseen WV2 dataset at full-resolution. The leftmost column shows the input LRMS image, with **red boxes** indicating zoomed-in regions for both LRMS and PAN images. Since WV2 is not included in the training phase, this evaluation represents a real-world zero-shot setting, assessing the generalization capability of PS models. Our proposed PAN-Crafter significantly outperforms the existing methods by effectively preserving both fine structural and spectral details of the input MS and PAN images

| WV3 Dataset        | Full-Resolution          |                          |                          | Reduced-Resolution       |                          |                          |                          |                           |                          |
|--------------------|--------------------------|--------------------------|--------------------------|--------------------------|--------------------------|--------------------------|--------------------------|---------------------------|--------------------------|
| Methods            | HQNR $\uparrow$          | $D_s\downarrow$          | $D_\lambda\downarrow$    | ERGAS $\downarrow$       | SCC $\uparrow$           | SAM $\downarrow$         | Q8 $\uparrow$            | PSNR $\uparrow$           | SSIM $\uparrow$          |
| PanNet [57]        | 0.918 $\pm$ 0.031        | 0.049 $\pm$ 0.019        | 0.035 $\pm$ 0.014        | 2.538 $\pm$ 0.597        | 0.979 $\pm$ 0.006        | 3.402 $\pm$ 0.672        | 0.913 $\pm$ 0.087        | 36.148 $\pm$ 1.958        | 0.966 $\pm$ 0.011        |
| MSDCNN [58]        | 0.924 $\pm$ 0.030        | 0.050 $\pm$ 0.020        | 0.028 $\pm$ 0.013        | 2.489 $\pm$ 0.620        | 0.979 $\pm$ 0.007        | 3.300 $\pm$ 0.654        | 0.914 $\pm$ 0.087        | 36.329 $\pm$ 1.748        | 0.967 $\pm$ 0.010        |
| FusionNet [50]     | 0.920 $\pm$ 0.030        | 0.053 $\pm$ 0.021        | 0.029 $\pm$ 0.011        | 2.428 $\pm$ 0.621        | 0.981 $\pm$ 0.007        | 3.188 $\pm$ 0.628        | 0.916 $\pm$ 0.087        | 36.569 $\pm$ 1.666        | 0.968 $\pm$ 0.009        |
| LAGNet [20]        | 0.915 $\pm$ 0.033        | 0.055 $\pm$ 0.023        | 0.033 $\pm$ 0.012        | 2.380 $\pm$ 0.617        | 0.981 $\pm$ 0.007        | 3.153 $\pm$ 0.608        | 0.916 $\pm$ 0.087        | 36.732 $\pm$ 1.723        | 0.970 $\pm$ 0.009        |
| S2DBPN [61]        | 0.946 $\pm$ 0.018        | 0.030 $\pm$ 0.010        | 0.025 $\pm$ 0.010        | 2.245 $\pm$ 0.541        | 0.985 $\pm$ 0.005        | 3.019 $\pm$ 0.588        | 0.917 $\pm$ 0.091        | 37.216 $\pm$ 1.888        | 0.972 $\pm$ 0.009        |
| PanDiff [30]       | 0.952 $\pm$ 0.009        | 0.034 $\pm$ 0.005        | <b>0.014</b> $\pm$ 0.005 | 2.276 $\pm$ 0.545        | 0.984 $\pm$ 0.004        | 3.058 $\pm$ 0.567        | 0.913 $\pm$ 0.084        | 37.029 $\pm$ 1.796        | 0.971 $\pm$ 0.008        |
| DCPNet [62]        | 0.923 $\pm$ 0.027        | 0.036 $\pm$ 0.012        | 0.043 $\pm$ 0.018        | 2.301 $\pm$ 0.569        | 0.984 $\pm$ 0.005        | 3.083 $\pm$ 0.537        | 0.915 $\pm$ 0.092        | 37.009 $\pm$ 1.735        | 0.972 $\pm$ 0.008        |
| TMDiff [52]        | 0.924 $\pm$ 0.015        | 0.059 $\pm$ 0.009        | 0.018 $\pm$ 0.007        | 2.151 $\pm$ 0.458        | 0.986 $\pm$ 0.004        | 2.885 $\pm$ 0.549        | 0.915 $\pm$ 0.086        | 37.477 $\pm$ 1.923        | 0.973 $\pm$ 0.008        |
| CANConv [13]       | 0.951 $\pm$ 0.013        | 0.030 $\pm$ 0.008        | 0.020 $\pm$ 0.008        | 2.163 $\pm$ 0.481        | 0.985 $\pm$ 0.005        | 2.927 $\pm$ 0.536        | 0.918 $\pm$ 0.082        | 37.441 $\pm$ 1.788        | 0.973 $\pm$ 0.008        |
| <b>PAN-Crafter</b> | <b>0.958</b> $\pm$ 0.009 | <b>0.027</b> $\pm$ 0.004 | 0.016 $\pm$ 0.006        | <b>2.040</b> $\pm$ 0.459 | <b>0.988</b> $\pm$ 0.003 | <b>2.787</b> $\pm$ 0.523 | <b>0.922</b> $\pm$ 0.082 | <b>37.956</b> $\pm$ 1.771 | <b>0.976</b> $\pm$ 0.006 |

Table 6. Quantitative comparison of deep learning-based PS methods on the WV3 dataset. **Red** indicates the best performance.

| GF2 Dataset        | Full-Resolution          |                          |                          | Reduced-Resolution       |                          |                          |                          |                           |                          |
|--------------------|--------------------------|--------------------------|--------------------------|--------------------------|--------------------------|--------------------------|--------------------------|---------------------------|--------------------------|
| Methods            | HQNR $\uparrow$          | $D_s\downarrow$          | $D_\lambda\downarrow$    | ERGAS $\downarrow$       | SCC $\uparrow$           | SAM $\downarrow$         | Q4 $\uparrow$            | PSNR $\uparrow$           | SSIM $\uparrow$          |
| PanNet [57]        | 0.929 $\pm$ 0.013        | 0.052 $\pm$ 0.009        | 0.020 $\pm$ 0.012        | 1.038 $\pm$ 0.214        | 0.975 $\pm$ 0.006        | 1.050 $\pm$ 0.209        | 0.963 $\pm$ 0.009        | 39.197 $\pm$ 2.009        | 0.959 $\pm$ 0.011        |
| MSDCNN [58]        | 0.898 $\pm$ 0.016        | 0.079 $\pm$ 0.011        | 0.026 $\pm$ 0.014        | 0.862 $\pm$ 0.141        | 0.983 $\pm$ 0.003        | 0.946 $\pm$ 0.166        | 0.972 $\pm$ 0.009        | 40.730 $\pm$ 1.564        | 0.971 $\pm$ 0.006        |
| FusionNet [50]     | 0.865 $\pm$ 0.018        | 0.105 $\pm$ 0.013        | 0.034 $\pm$ 0.013        | 0.960 $\pm$ 0.193        | 0.980 $\pm$ 0.005        | 0.971 $\pm$ 0.195        | 0.967 $\pm$ 0.008        | 39.866 $\pm$ 1.955        | 0.966 $\pm$ 0.009        |
| LAGNet [20]        | 0.895 $\pm$ 0.021        | 0.078 $\pm$ 0.013        | 0.030 $\pm$ 0.014        | 0.816 $\pm$ 0.121        | 0.985 $\pm$ 0.003        | 0.886 $\pm$ 0.140        | 0.974 $\pm$ 0.009        | 41.147 $\pm$ 1.384        | 0.974 $\pm$ 0.005        |
| S2DBPN [61]        | 0.935 $\pm$ 0.011        | 0.046 $\pm$ 0.007        | 0.020 $\pm$ 0.012        | 0.686 $\pm$ 0.125        | 0.990 $\pm$ 0.002        | 0.772 $\pm$ 0.149        | 0.981 $\pm$ 0.007        | 42.686 $\pm$ 1.676        | 0.980 $\pm$ 0.005        |
| PanDiff [30]       | 0.936 $\pm$ 0.011        | 0.045 $\pm$ 0.009        | 0.020 $\pm$ 0.014        | 0.674 $\pm$ 0.110        | 0.990 $\pm$ 0.002        | 0.767 $\pm$ 0.134        | 0.981 $\pm$ 0.007        | 42.827 $\pm$ 1.462        | 0.980 $\pm$ 0.005        |
| DCPNet [62]        | 0.953 $\pm$ 0.019        | 0.024 $\pm$ 0.008        | 0.024 $\pm$ 0.022        | 0.724 $\pm$ 0.138        | 0.988 $\pm$ 0.003        | 0.806 $\pm$ 0.153        | 0.980 $\pm$ 0.007        | 42.312 $\pm$ 1.682        | 0.979 $\pm$ 0.005        |
| TMDiff [52]        | 0.942 $\pm$ 0.016        | 0.030 $\pm$ 0.010        | 0.029 $\pm$ 0.011        | 0.754 $\pm$ 0.143        | 0.988 $\pm$ 0.003        | 0.764 $\pm$ 0.155        | 0.979 $\pm$ 0.007        | 41.896 $\pm$ 1.765        | 0.977 $\pm$ 0.005        |
| CANConv [13]       | 0.919 $\pm$ 0.011        | 0.063 $\pm$ 0.009        | <b>0.019</b> $\pm$ 0.010 | 0.653 $\pm$ 0.124        | 0.991 $\pm$ 0.002        | 0.722 $\pm$ 0.138        | 0.983 $\pm$ 0.006        | 43.166 $\pm$ 1.705        | 0.982 $\pm$ 0.004        |
| <b>PAN-Crafter</b> | <b>0.964</b> $\pm$ 0.015 | <b>0.017</b> $\pm$ 0.007 | 0.020 $\pm$ 0.013        | <b>0.552</b> $\pm$ 0.093 | <b>0.994</b> $\pm$ 0.001 | <b>0.596</b> $\pm$ 0.110 | <b>0.988</b> $\pm$ 0.006 | <b>45.076</b> $\pm$ 1.610 | <b>0.988</b> $\pm$ 0.003 |

Table 7. Quantitative comparison of deep learning-based PS methods on the GF2 dataset. **Red** indicates the best performance.

| QB Dataset         | Full-Resolution          |                          |                          | Reduced-Resolution       |                          |                          |                          |                           |                          |
|--------------------|--------------------------|--------------------------|--------------------------|--------------------------|--------------------------|--------------------------|--------------------------|---------------------------|--------------------------|
| Methods            | HQNR $\uparrow$          | $D_s\downarrow$          | $D_\lambda\downarrow$    | ERGAS $\downarrow$       | SCC $\uparrow$           | SAM $\downarrow$         | Q4 $\uparrow$            | PSNR $\uparrow$           | SSIM $\uparrow$          |
| PanNet [57]        | 0.851 $\pm$ 0.035        | 0.092 $\pm$ 0.021        | 0.063 $\pm$ 0.019        | 4.856 $\pm$ 0.590        | 0.966 $\pm$ 0.015        | 5.273 $\pm$ 0.946        | 0.911 $\pm$ 0.094        | 35.563 $\pm$ 1.930        | 0.939 $\pm$ 0.012        |
| MSDCNN [58]        | 0.888 $\pm$ 0.037        | 0.058 $\pm$ 0.027        | 0.058 $\pm$ 0.014        | 4.074 $\pm$ 0.244        | 0.977 $\pm$ 0.010        | 4.828 $\pm$ 0.824        | 0.925 $\pm$ 0.098        | 37.040 $\pm$ 1.778        | 0.954 $\pm$ 0.007        |
| FusionNet [50]     | 0.853 $\pm$ 0.041        | 0.079 $\pm$ 0.025        | 0.074 $\pm$ 0.022        | 4.183 $\pm$ 0.266        | 0.975 $\pm$ 0.011        | 4.892 $\pm$ 0.822        | 0.923 $\pm$ 0.100        | 36.821 $\pm$ 1.765        | 0.952 $\pm$ 0.007        |
| LAGNet [20]        | 0.892 $\pm$ 0.024        | <b>0.035</b> $\pm$ 0.009 | 0.075 $\pm$ 0.019        | 3.845 $\pm$ 0.323        | 0.980 $\pm$ 0.009        | 4.682 $\pm$ 0.785        | 0.930 $\pm$ 0.095        | 37.565 $\pm$ 1.721        | 0.958 $\pm$ 0.006        |
| S2DBPN [61]        | 0.908 $\pm$ 0.044        | 0.036 $\pm$ 0.023        | 0.059 $\pm$ 0.026        | 3.956 $\pm$ 0.291        | 0.980 $\pm$ 0.008        | 4.849 $\pm$ 0.822        | 0.928 $\pm$ 0.093        | 37.314 $\pm$ 1.782        | 0.956 $\pm$ 0.006        |
| PanDiff [30]       | 0.919 $\pm$ 0.010        | 0.055 $\pm$ 0.012        | <b>0.028</b> $\pm$ 0.011 | 3.723 $\pm$ 0.280        | 0.982 $\pm$ 0.007        | 4.611 $\pm$ 0.768        | 0.935 $\pm$ 0.084        | 37.842 $\pm$ 1.721        | 0.959 $\pm$ 0.006        |
| DCPNet [62]        | 0.880 $\pm$ 0.013        | 0.073 $\pm$ 0.013        | 0.051 $\pm$ 0.017        | 3.618 $\pm$ 0.313        | 0.983 $\pm$ 0.010        | <b>4.420</b> $\pm$ 0.710 | 0.935 $\pm$ 0.095        | 38.079 $\pm$ 1.454        | <b>0.963</b> $\pm$ 0.004 |
| TMDiff [52]        | 0.901 $\pm$ 0.011        | 0.068 $\pm$ 0.012        | 0.034 $\pm$ 0.016        | 3.804 $\pm$ 0.279        | 0.981 $\pm$ 0.008        | 4.627 $\pm$ 0.814        | 0.930 $\pm$ 0.096        | 37.642 $\pm$ 1.831        | 0.958 $\pm$ 0.006        |
| CANConv [13]       | 0.893 $\pm$ 0.010        | 0.070 $\pm$ 0.017        | 0.039 $\pm$ 0.012        | 3.740 $\pm$ 0.304        | 0.982 $\pm$ 0.007        | 4.554 $\pm$ 0.788        | 0.935 $\pm$ 0.087        | 37.795 $\pm$ 1.801        | 0.960 $\pm$ 0.006        |
| <b>PAN-Crafter</b> | <b>0.920</b> $\pm$ 0.027 | 0.039 $\pm$ 0.020        | 0.043 $\pm$ 0.011        | <b>3.570</b> $\pm$ 0.286 | <b>0.984</b> $\pm$ 0.008 | 4.426 $\pm$ 0.740        | <b>0.938</b> $\pm$ 0.087 | <b>38.195</b> $\pm$ 1.597 | <b>0.963</b> $\pm$ 0.005 |

Table 8. Quantitative comparison of deep learning-based PS methods on the QB dataset. **Red** indicates the best performance.

| WV2 Dataset        | Full-Resolution (Unseen satellite dataset) |                      |                      | Reduced-Resolution (Unseen satellite dataset) |                      |                      |                      |                       |                      |
|--------------------|--------------------------------------------|----------------------|----------------------|-----------------------------------------------|----------------------|----------------------|----------------------|-----------------------|----------------------|
| Methods            | HQNR↑                                      | $D_s$ ↓              | $D_\lambda$ ↓        | ERGAS↓                                        | SCC↑                 | SAM↓                 | Q8↑                  | PSNR↑                 | SSIM↑                |
| PanNet [57]        | 0.875 ± 0.064                              | 0.032 ± 0.005        | 0.096 ± 0.066        | 5.481 ± 0.326                                 | 0.876 ± 0.018        | 7.040 ± 0.417        | 0.786 ± 0.084        | 27.120 ± 1.827        | 0.770 ± 0.053        |
| MSDCNN [58]        | 0.862 ± 0.050                              | 0.029 ± 0.013        | 0.113 ± 0.041        | 4.930 ± 0.378                                 | 0.905 ± 0.009        | 5.898 ± 0.490        | 0.812 ± 0.090        | 27.901 ± 1.812        | 0.804 ± 0.040        |
| FusionNet [50]     | 0.862 ± 0.034                              | 0.038 ± 0.005        | 0.104 ± 0.032        | 5.100 ± 0.367                                 | 0.902 ± 0.011        | 6.118 ± 0.533        | 0.786 ± 0.083        | 27.616 ± 1.765        | 0.788 ± 0.042        |
| LAGNet [20]        | 0.902 ± 0.045                              | <b>0.024</b> ± 0.018 | 0.076 ± 0.032        | 5.133 ± 0.432                                 | 0.885 ± 0.015        | 6.094 ± 0.559        | 0.792 ± 0.081        | 27.525 ± 2.008        | 0.777 ± 0.054        |
| S2DBPN [61]        | 0.813 ± 0.066                              | 0.065 ± 0.019        | 0.129 ± 0.080        | 5.703 ± 0.257                                 | 0.915 ± 0.011        | 7.063 ± 0.421        | 0.805 ± 0.092        | 26.748 ± 1.892        | 0.804 ± 0.041        |
| DCPNet [62]        | 0.797 ± 0.134                              | 0.034 ± 0.022        | 0.176 ± 0.129        | 5.507 ± 0.264                                 | <b>0.931</b> ± 0.009 | 10.174 ± 1.115       | 0.843 ± 0.094        | 27.063 ± 1.541        | 0.855 ± 0.021        |
| PanDiff [30]       | 0.932 ± 0.019                              | 0.043 ± 0.010        | 0.026 ± 0.019        | 4.291 ± 0.418                                 | 0.916 ± 0.010        | 5.430 ± 0.601        | 0.840 ± 0.087        | 28.964 ± 1.709        | 0.832 ± 0.033        |
| TMDiff [52]        | 0.874 ± 0.013                              | 0.088 ± 0.021        | 0.042 ± 0.020        | 5.157 ± 0.604                                 | 0.875 ± 0.008        | 6.087 ± 0.786        | 0.777 ± 0.079        | 27.473 ± 1.634        | 0.762 ± 0.045        |
| CANConv [13]       | 0.876 ± 0.044                              | 0.060 ± 0.022        | 0.068 ± 0.049        | 4.328 ± 0.413                                 | 0.918 ± 0.008        | 5.481 ± 0.595        | 0.841 ± 0.087        | 29.005 ± 1.719        | 0.837 ± 0.031        |
| <b>PAN-Crafter</b> | <b>0.942</b> ± 0.019                       | 0.036 ± 0.010        | <b>0.022</b> ± 0.008 | <b>4.169</b> ± 0.397                          | 0.924 ± 0.009        | <b>5.078</b> ± 0.561 | <b>0.846</b> ± 0.085 | <b>29.276</b> ± 1.621 | <b>0.839</b> ± 0.029 |

Table 9. Quantitative comparison of deep learning-based PS methods on the unseen WV2 dataset. All models are trained on WV3 and evaluated on WV2 to assess real-world generalization. **Red** indicate the best performance in each metric.

| Methods     | LAGConv [20] | S2DBPN [61] | PanDiff [30] | DCPNet [62] | TMDiff [52] | CANConv [13] | <b>PAN-Crafter</b> |
|-------------|--------------|-------------|--------------|-------------|-------------|--------------|--------------------|
| Time (s)    | 0.004        | 0.005       | 2.955        | 0.109       | 9.997       | 0.451        | 0.009              |
| Memory (MB) | 3360.1       | 2444.0      | 2383.6       | 7386.8      | 10147.4     | 2777.6       | 1751.9             |
| FLOPs (G)   | 8.43         | 158.94      | 62.07        | 105.40      | 1284.42     | 52.21        | 79.03              |
| Params. (M) | 0.15         | 16.19       | 9.52         | 1.414       | 154.10      | 0.79         | 7.17               |

Table 10. Computational efficiency comparison of deep learning-based PS methods. We report inference time (s), memory usage (MB), FLOPs (G), and parameter count (M).

| WV3 Dataset |      | Full-Resolution |              |               | Reduced-Resolution |              |              |              |               |              | Inference Time↓ (s) | Memory↓ (GB) |
|-------------|------|-----------------|--------------|---------------|--------------------|--------------|--------------|--------------|---------------|--------------|---------------------|--------------|
| CM3A        | MARs | HQNR↑           | $D_s$ ↓      | $D_\lambda$ ↓ | ERGAS↓             | SCC↑         | SAM↓         | Q8↑          | PSNR↑         | SSIM↑        |                     |              |
|             |      | 0.948           | 0.035        | 0.018         | 2.232              | 0.985        | 2.980        | 0.913        | 37.245        | 0.972        | 0.006               | 1.537        |
| ✓           |      | 0.949           | 0.035        | 0.016         | 2.212              | 0.985        | 2.970        | 0.915        | 37.285        | 0.973        | 0.007               | 1.556        |
|             | ✓    | 0.956           | 0.028        | 0.017         | 2.122              | 0.987        | 2.873        | 0.919        | 37.602        | 0.974        | 0.009               | 1.701        |
| ✓           | ✓    | <b>0.958</b>    | <b>0.027</b> | <b>0.016</b>  | <b>2.040</b>       | <b>0.988</b> | <b>2.787</b> | <b>0.922</b> | <b>37.956</b> | <b>0.976</b> | 0.009               | 1.711        |

Table 11. Ablation studies on CM3A and MARs on the WV3 dataset.

| GF2 Dataset |      | Full-Resolution |              |               | Reduced-Resolution |              |              |              |               |              |
|-------------|------|-----------------|--------------|---------------|--------------------|--------------|--------------|--------------|---------------|--------------|
| CM3A        | MARs | HQNR↑           | $D_s$ ↓      | $D_\lambda$ ↓ | ERGAS↓             | SCC↑         | SAM↓         | Q4↑          | PSNR↑         | SSIM↑        |
|             |      | 0.959           | 0.021        | 0.021         | 0.632              | 0.992        | 0.723        | 0.984        | 43.476        | 0.984        |
| ✓           |      | 0.953           | 0.025        | 0.023         | 0.624              | 0.992        | 0.718        | 0.984        | 43.618        | 0.984        |
|             | ✓    | 0.945           | 0.032        | 0.023         | 0.574              | 0.993        | 0.651        | 0.986        | 44.298        | 0.986        |
| ✓           | ✓    | <b>0.964</b>    | <b>0.017</b> | <b>0.020</b>  | <b>0.552</b>       | <b>0.994</b> | <b>0.596</b> | <b>0.988</b> | <b>45.076</b> | <b>0.988</b> |

Table 12. Ablation studies on CM3A and MARs on the GF2 dataset.

| QB Dataset |      | Full-Resolution |              |               | Reduced-Resolution |              |              |              |               |              |
|------------|------|-----------------|--------------|---------------|--------------------|--------------|--------------|--------------|---------------|--------------|
| CM3A       | MARs | HQNR↑           | $D_s$ ↓      | $D_\lambda$ ↓ | ERGAS↓             | SCC↑         | SAM↓         | Q4↑          | PSNR↑         | SSIM↑        |
|            |      | 0.856           | 0.086        | 0.064         | 4.907              | 0.977        | 5.200        | 0.923        | 35.476        | 0.947        |
| ✓          |      | 0.879           | 0.062        | 0.063         | 4.869              | 0.975        | 5.168        | 0.922        | 35.538        | 0.947        |
|            | ✓    | 0.896           | 0.047        | 0.060         | 3.857              | 0.980        | 4.661        | 0.930        | 37.557        | 0.959        |
| ✓          | ✓    | <b>0.920</b>    | <b>0.039</b> | <b>0.043</b>  | <b>3.570</b>       | <b>0.984</b> | <b>4.426</b> | <b>0.938</b> | <b>38.195</b> | <b>0.963</b> |

Table 13. Ablation studies on CM3A and MARs on the QB dataset.

| $\alpha$ | $\beta, \gamma$ | WV3 / GF2 / QB Datasets      |                              |                              |                                 |
|----------|-----------------|------------------------------|------------------------------|------------------------------|---------------------------------|
|          |                 | HQNR↑                        | ERGAS↓                       | SAM↓                         | PSNR↑                           |
|          |                 | 0.945 / 0.951 / 0.908        | 2.214 / 0.623 / 3.758        | 2.901 / 0.642 / 4.523        | 37.210 / 44.321 / 37.842        |
| ✓        |                 | 0.949 / 0.957 / 0.915        | 2.150 / 0.589 / 3.669        | 2.829 / 0.618 / 4.472        | 37.562 / 44.758 / 38.021        |
|          | ✓               | 0.947 / 0.956 / 0.913        | 2.185 / 0.601 / 3.690        | 2.841 / 0.624 / 4.488        | 37.433 / 44.612 / 37.935        |
| ✓        | ✓               | <b>0.958 / 0.964 / 0.920</b> | <b>2.040 / 0.552 / 3.570</b> | <b>2.787 / 0.596 / 4.426</b> | <b>37.956 / 45.076 / 38.195</b> |

Table 14. Ablation studies on  $\alpha$ ,  $\beta$ , and  $\gamma$  on the WV3, GF2, and QB datasets.

| $k$ | WV3 / GF2 / QB Datasets      |                                     |                                     |                                        |              |              |
|-----|------------------------------|-------------------------------------|-------------------------------------|----------------------------------------|--------------|--------------|
|     | HQNR↑                        | ERGAS↓                              | SAM↓                                | PSNR↑                                  | Time↓        | Memory↓      |
| 3   | <b>0.958</b> / 0.964 / 0.920 | 2.040 / <b>0.552</b> / <b>3.570</b> | 2.787 / <b>0.596</b> / <b>4.426</b> | 37.956 / <b>45.076</b> / 38.195        | <b>0.009</b> | <b>1.711</b> |
| 5   | 0.953 / <b>0.965</b> / 0.919 | <b>2.021</b> / 0.555 / 3.577        | <b>2.785</b> / 0.600 / 4.433        | <b>37.966</b> / 45.001 / <b>38.201</b> | 0.019        | 3.429        |
| 7   | 0.955 / 0.961 / <b>0.921</b> | 2.033 / 0.553 / 3.575               | 2.790 / 0.599 / 4.429               | 37.949 / 45.010 / 38.190               | 0.042        | 5.243        |

Table 15. Ablation studies on  $k$  on the WV3, GF2, and QB datasets.

| Training Strategy | WV3 / GF2 / QB Datasets                    |                                            |                                            |                                               |
|-------------------|--------------------------------------------|--------------------------------------------|--------------------------------------------|-----------------------------------------------|
|                   | HQNR↑                                      | ERGAS↓                                     | SAM↓                                       | PSNR↑                                         |
| w/o MARs          | 0.949 / 0.953 / 0.879                      | 2.212 / 0.624 / 4.869                      | 2.970 / 0.718 / 5.168                      | 37.285 / 43.618 / 35.538                      |
| Two-stage         | 0.945 / 0.953 / 0.890                      | 2.199 / 0.602 / 4.551                      | 2.899 / 0.688 / 4.907                      | 37.345 / 43.921 / 36.081                      |
| w/ MARs           | <b>0.958</b> / <b>0.964</b> / <b>0.920</b> | <b>2.040</b> / <b>0.552</b> / <b>3.570</b> | <b>2.787</b> / <b>0.596</b> / <b>4.426</b> | <b>37.956</b> / <b>45.076</b> / <b>38.195</b> |

Table 16. Ablation studies on training strategy on the WV3, GF2, and QB datasets.

| Layer Type | WV3 / GF2 / QB Datasets                    |                                            |                                            |                                               |              |              |
|------------|--------------------------------------------|--------------------------------------------|--------------------------------------------|-----------------------------------------------|--------------|--------------|
|            | HQNR↑                                      | ERGAS↓                                     | SAM↓                                       | PSNR↑                                         | Time↓        | Memory↓      |
| Attn.      | <b>0.948</b> / <b>0.959</b> / <b>0.856</b> | <b>2.232</b> / <b>0.632</b> / <b>4.907</b> | <b>2.980</b> / <b>0.723</b> / <b>5.200</b> | <b>37.245</b> / <b>43.476</b> / <b>35.476</b> | 0.006        | 1.537        |
| Conv.      | 0.937 / 0.943 / 0.850                      | 2.322 / 0.741 / 5.142                      | 3.120 / 0.831 / 5.463                      | 36.988 / 42.590 / 35.218                      | <b>0.004</b> | <b>1.209</b> |

Table 17. Ablation studies on layer type on the WV3, GF2, and QB datasets.
